# Supplementary material for: Brca1 breast tumors contain distinct CD44+/CD24- and CD133+ cells with cancer stem cell characteristics
Source: PubMed Central journal article supplement (PMC2374965; doi:10.1186/bcr1855), 2008-02-01

# Supplemental Figure 1

## Morphology of 16 cell lines under phase contrast microscopy (20x)

### BRCA1 Tumor A

P3

P2

A1.1

A1.5

A1.8

A1.9

A1.10

P3.17

P2.1

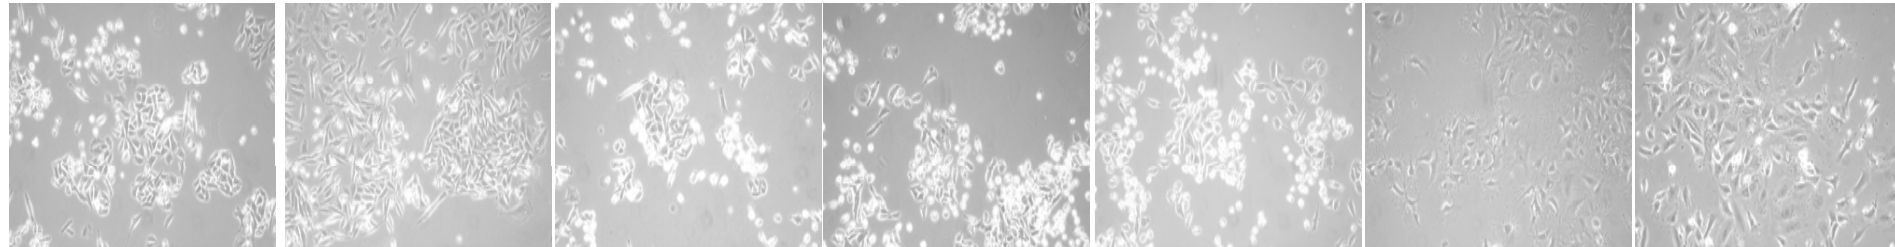

### BRCA1 Tumor B

B-1

B-2

B-8

B-15

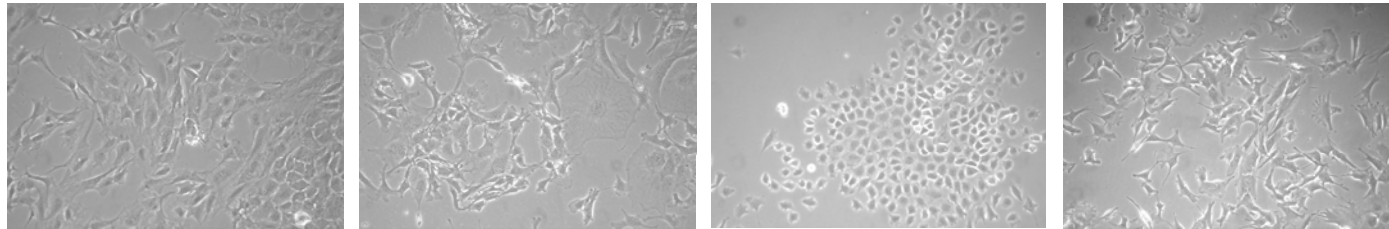

### BRCA1 Tumor RP

RP.1

RP.3

RP.4

RP.10

RP.11

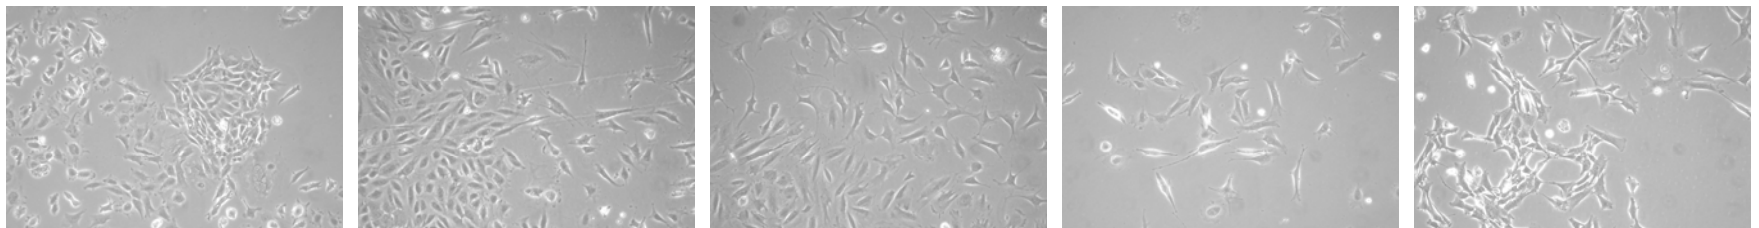

Supplement: bcr1855-S2.pdf [file bcr1855-S2.pdf]
