# Supplementary material for: Brca1 breast tumors contain distinct CD44+/CD24- and CD133+ cells with cancer stem cell characteristics
Source: PubMed Central journal article supplement (PMC2374965; doi:10.1186/bcr1855), 2008-02-01

# Supplemental Figure 4

**A1.1**

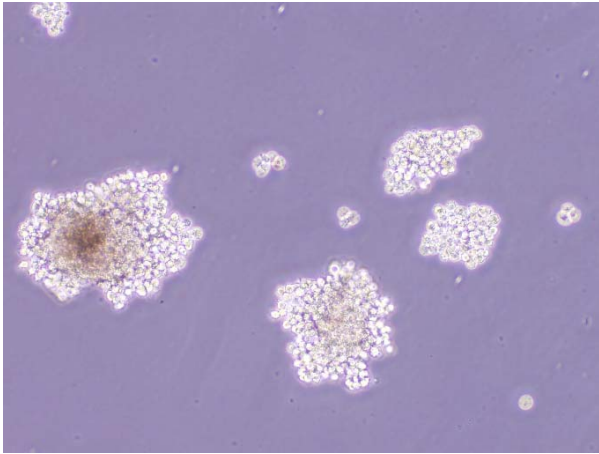

**A1.8**

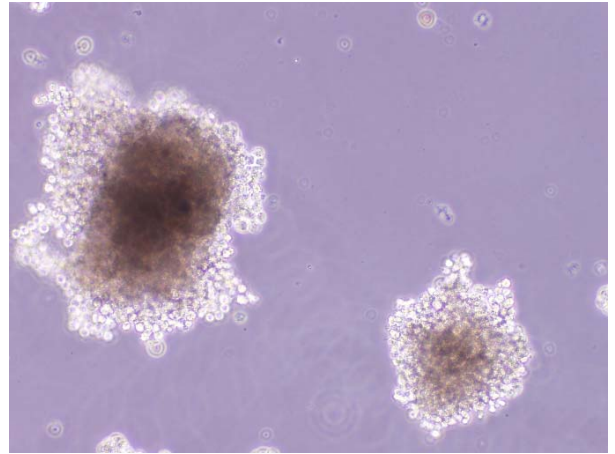

**B.15**

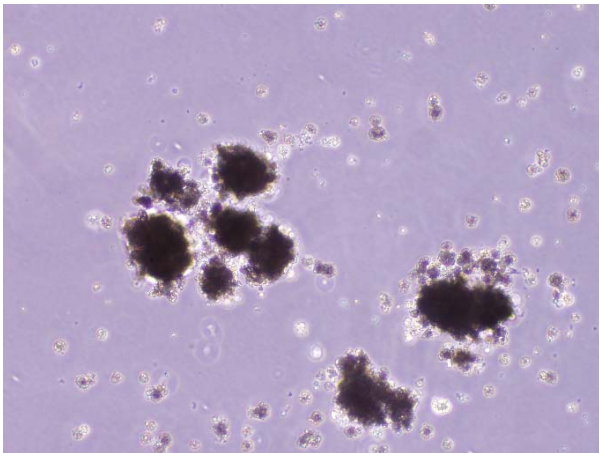

**P3.17**

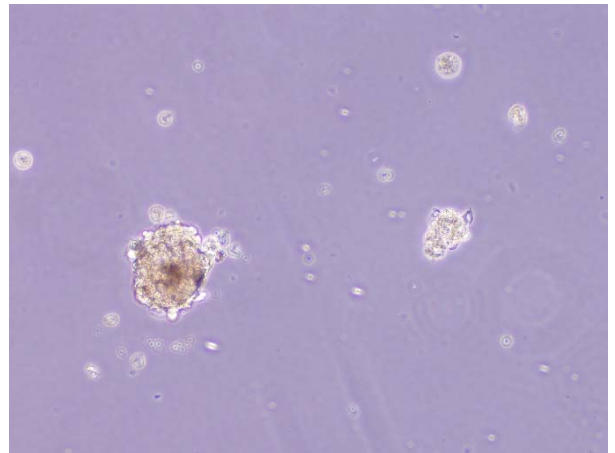

**P2.1**

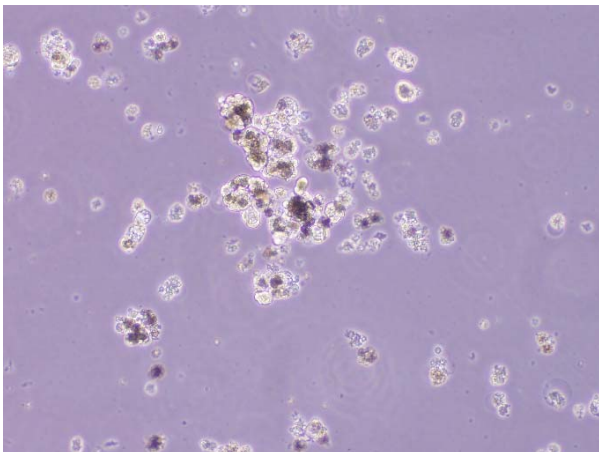

**RP.1**

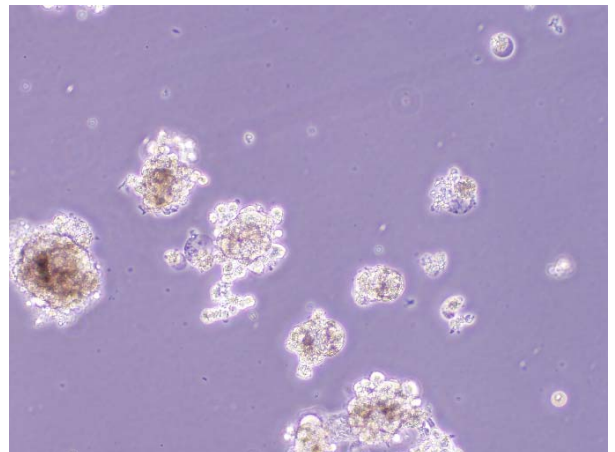

Supplement: bcr1855-S5.pdf [file bcr1855-S5.pdf]
